# Supplementary material
Source: publisher figshare collection journal article supplement (https://plos.figshare.com/articles/dataset/_/1565263)

## S2 Fig

Pyrosequencing revealed no methylation of CpG islands within the promoter region of the miR-17-92 cluster in a panel of breast cancer cell lines and primary normal- and cancer-associated fibroblasts

Assay Name: Mir17 CpG assay 1739-2047  
Sample ID: Primary normal fibroblasts from patient 1

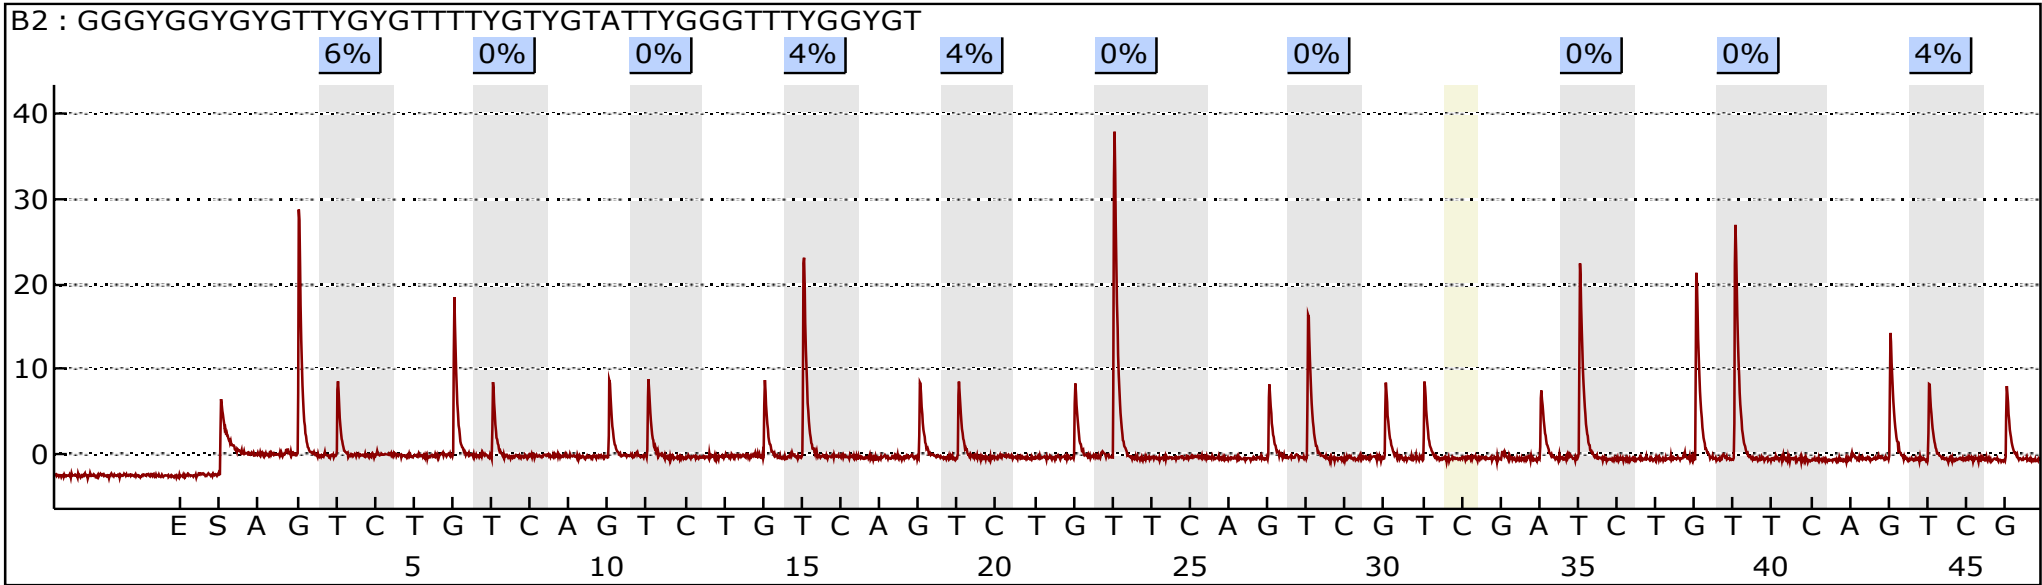

Assay Name: Mir17 CpG assay 1739-2047  
Sample ID: Primary cancer-associated fibroblasts from patient 1

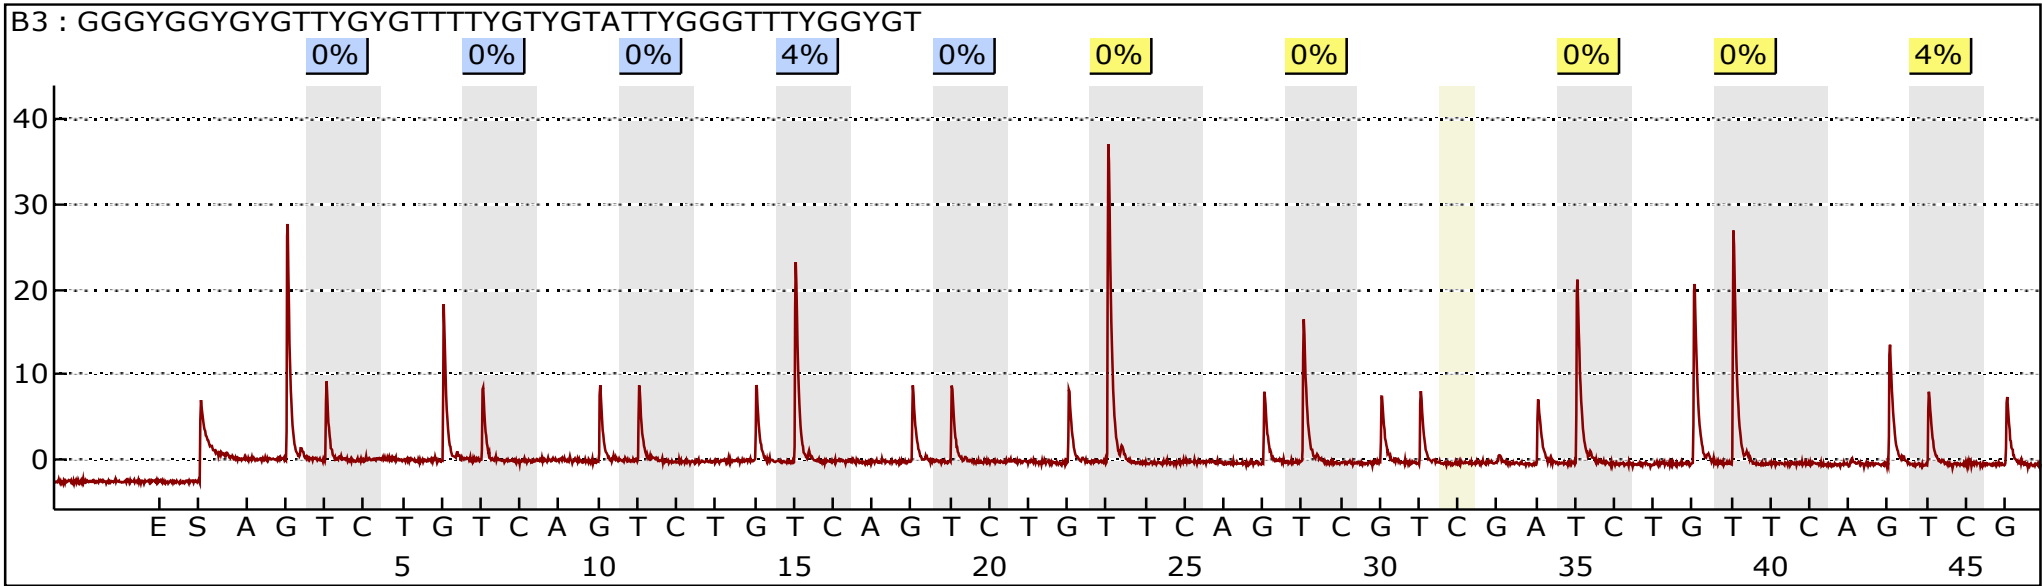

Assay Name: Mir17 CpG assay 1739-2047  
Sample ID: Primary normal fibroblasts from patient 2

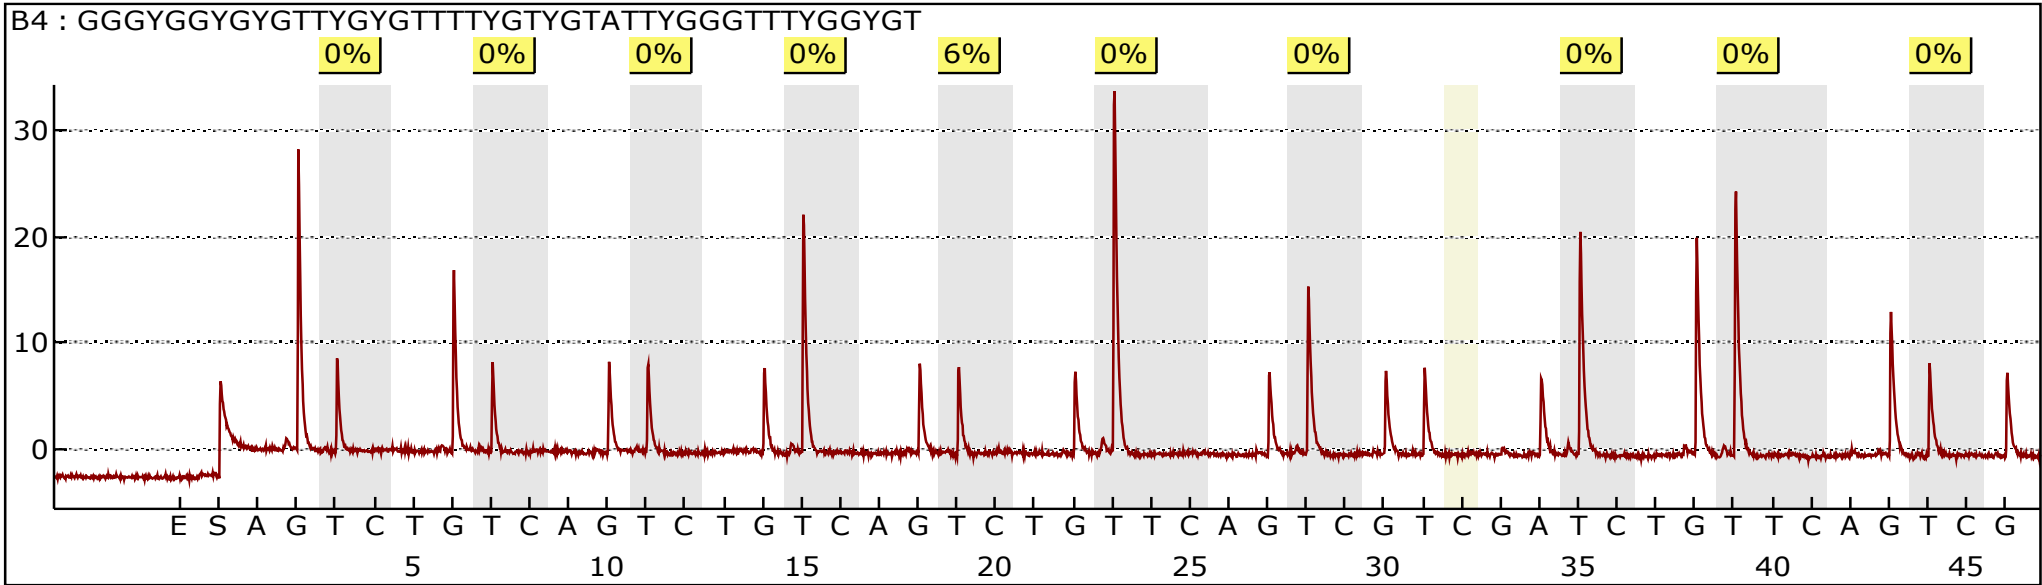

Assay Name: Mir17 CpG assay 1739-2047  
Sample ID: Primary cancer-associated fibroblasts from patient 2

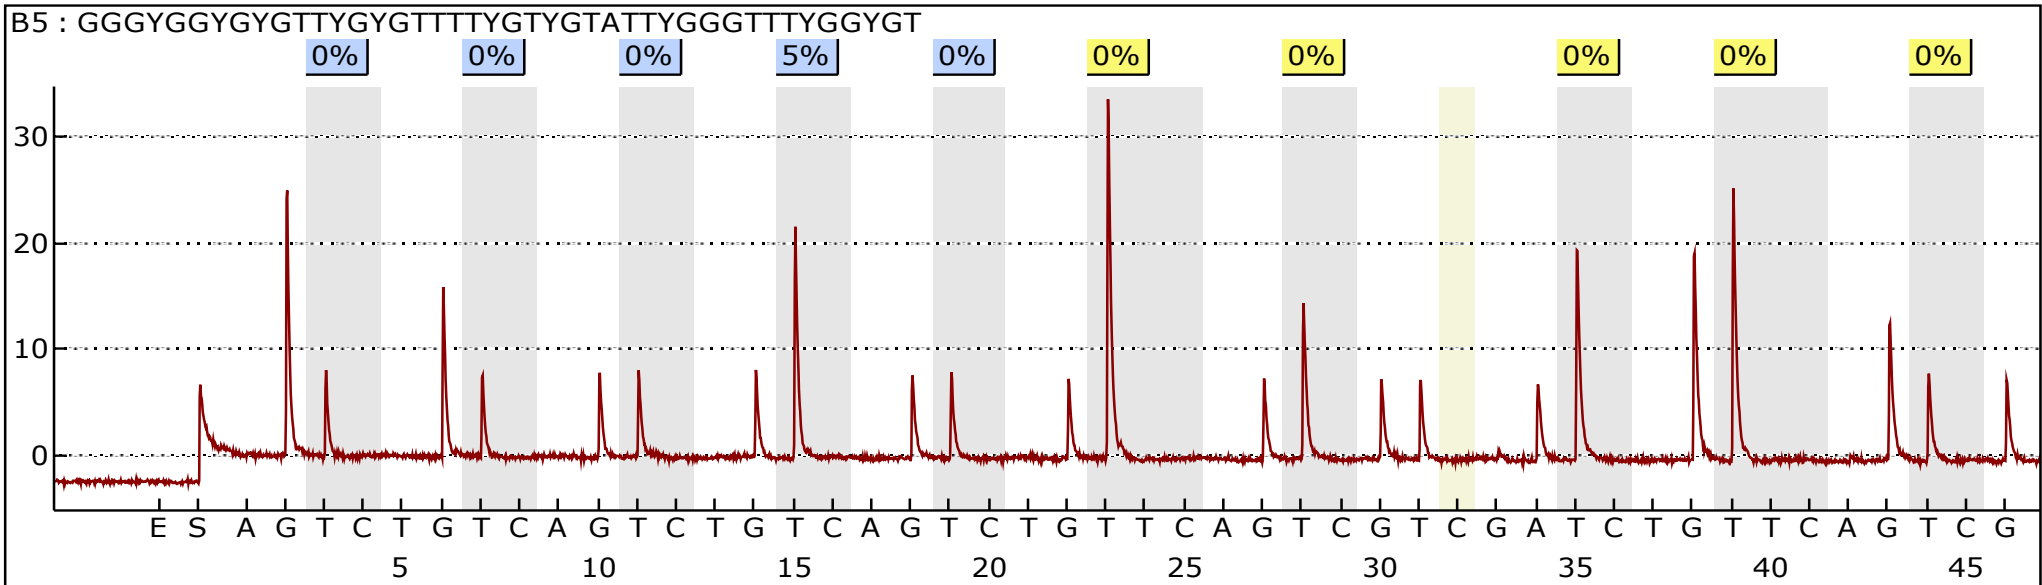

Assay Name: Mir17 CpG assay 1739-2047  
Sample ID: HB2 cell line

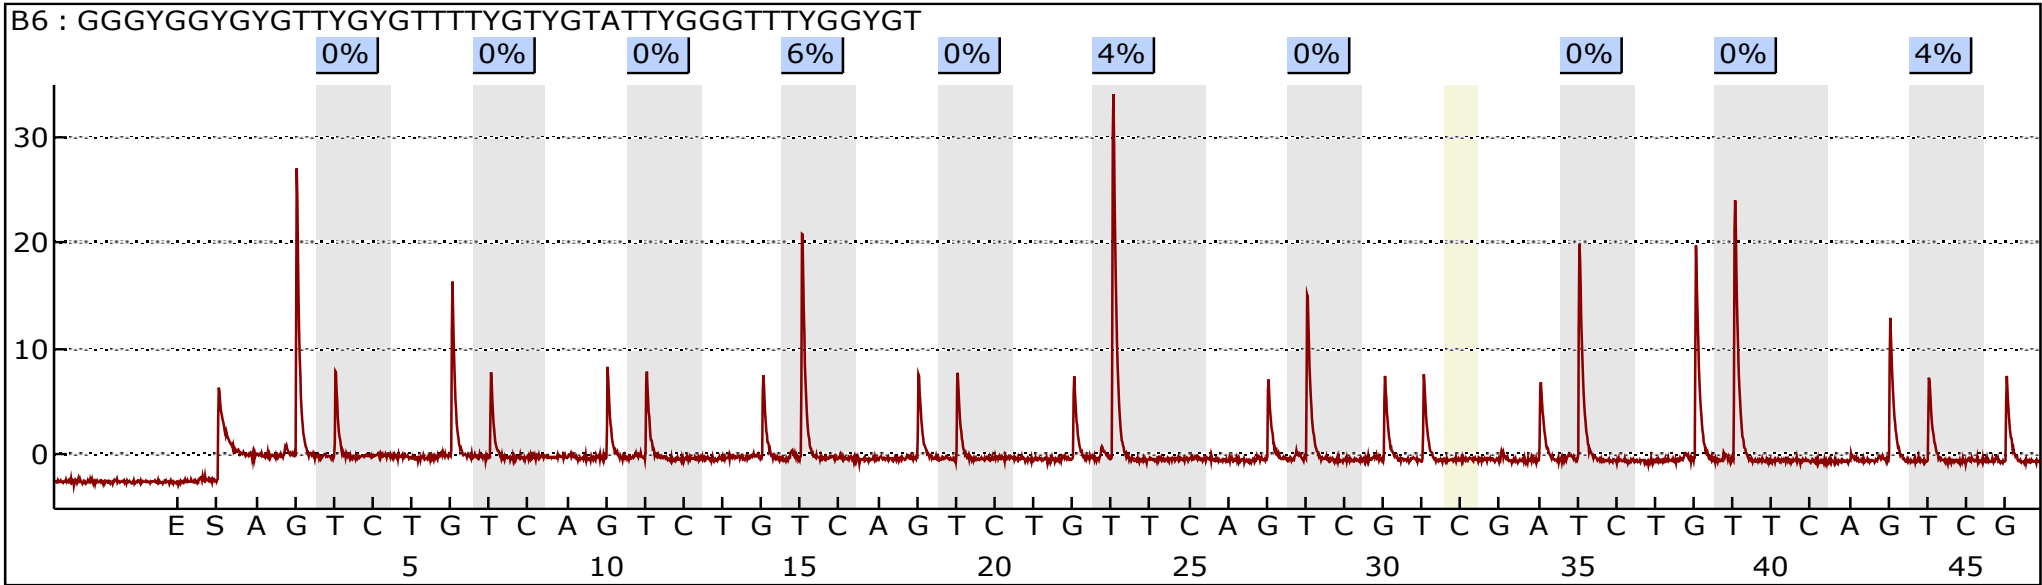

Assay Name: Mir17 CpG assay 1739-2047  
Sample ID: BT474 cell line

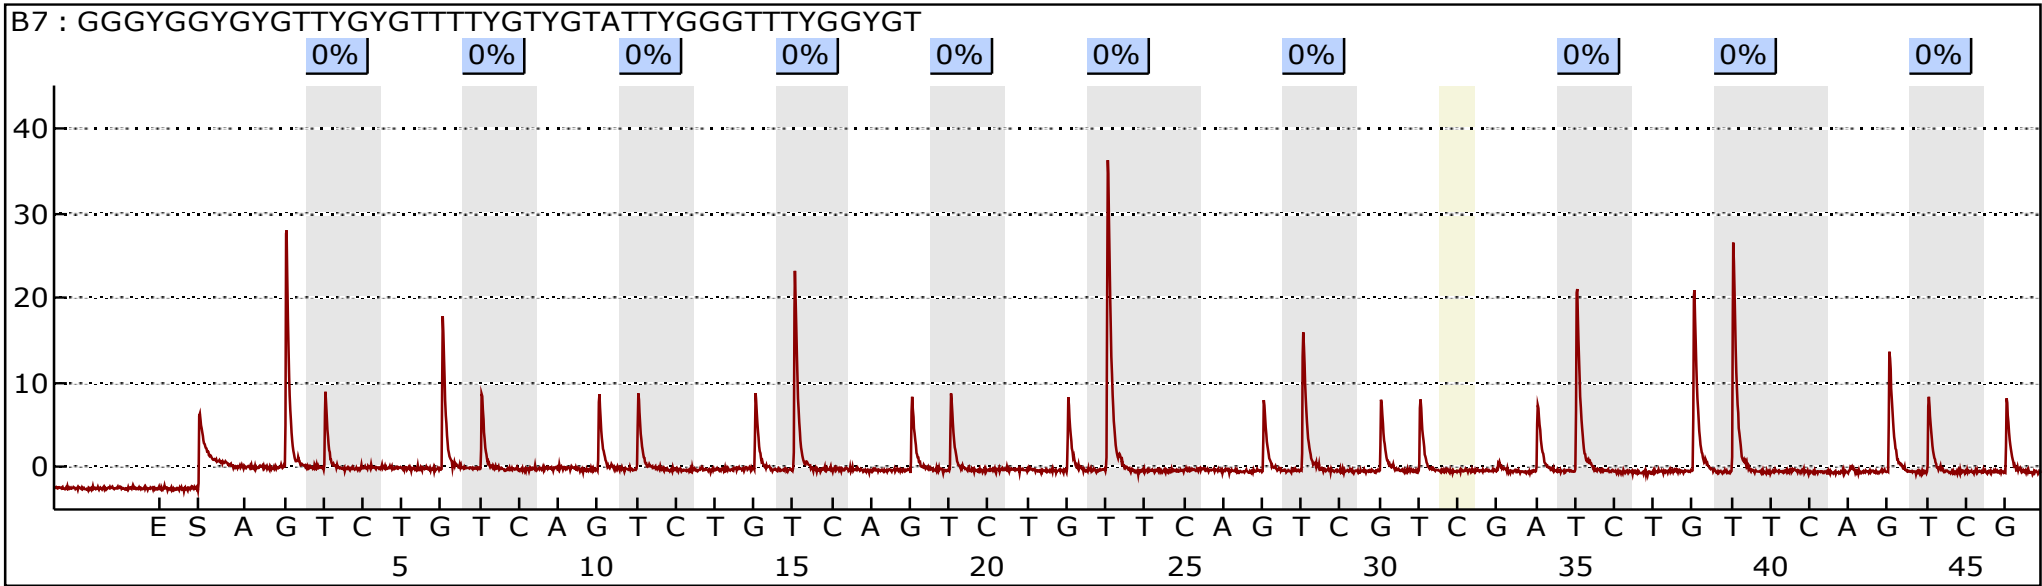

Assay Name: Mir17 CpG assay 1739-2047  
Sample ID: T47D cell line

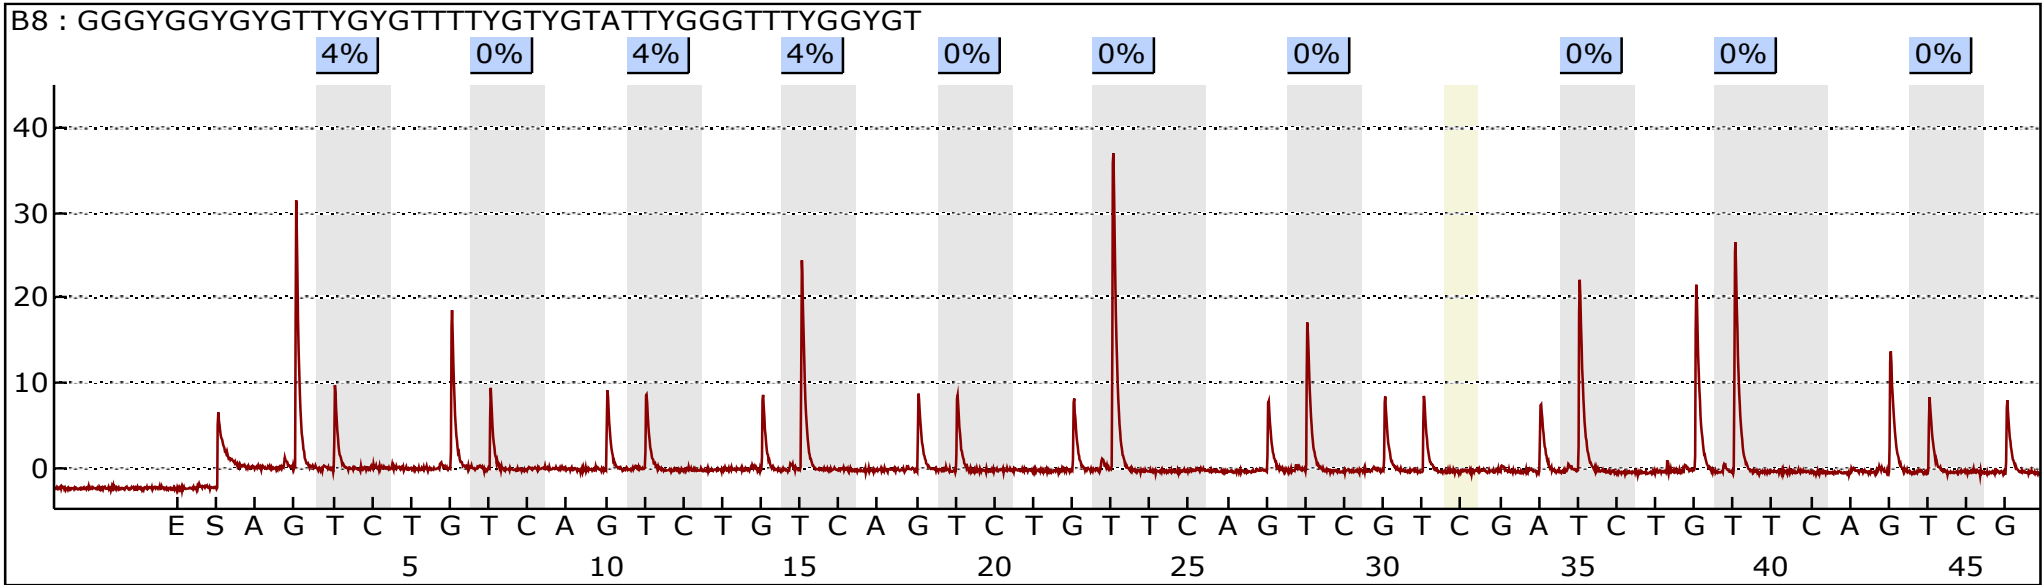

Assay Name: Mir17 CpG assay 1739-2047  
Sample ID: MDAMB453 cell line

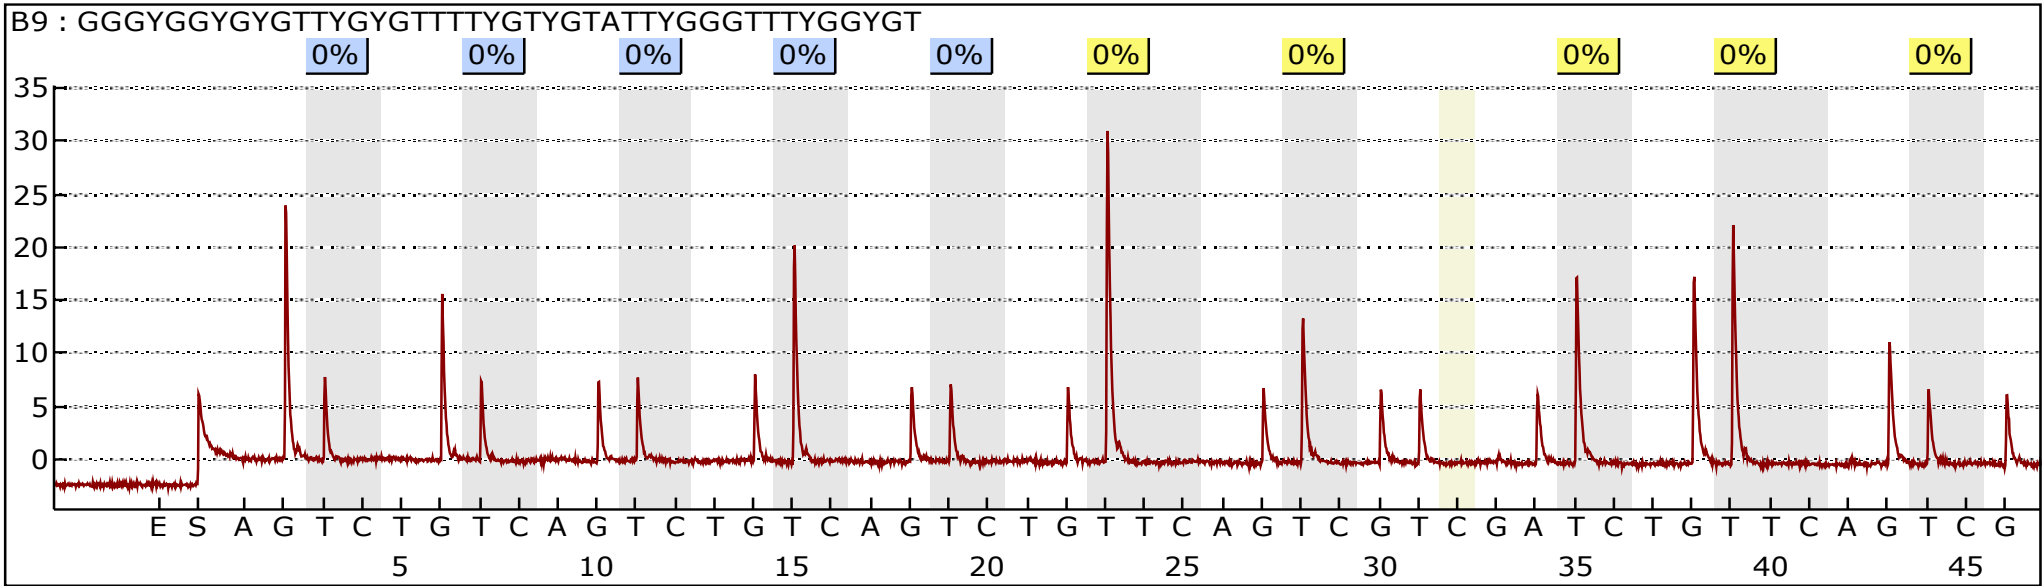

Assay Name: Mir17 CpG assay 1739-2047  
Sample ID: BT20 cell line

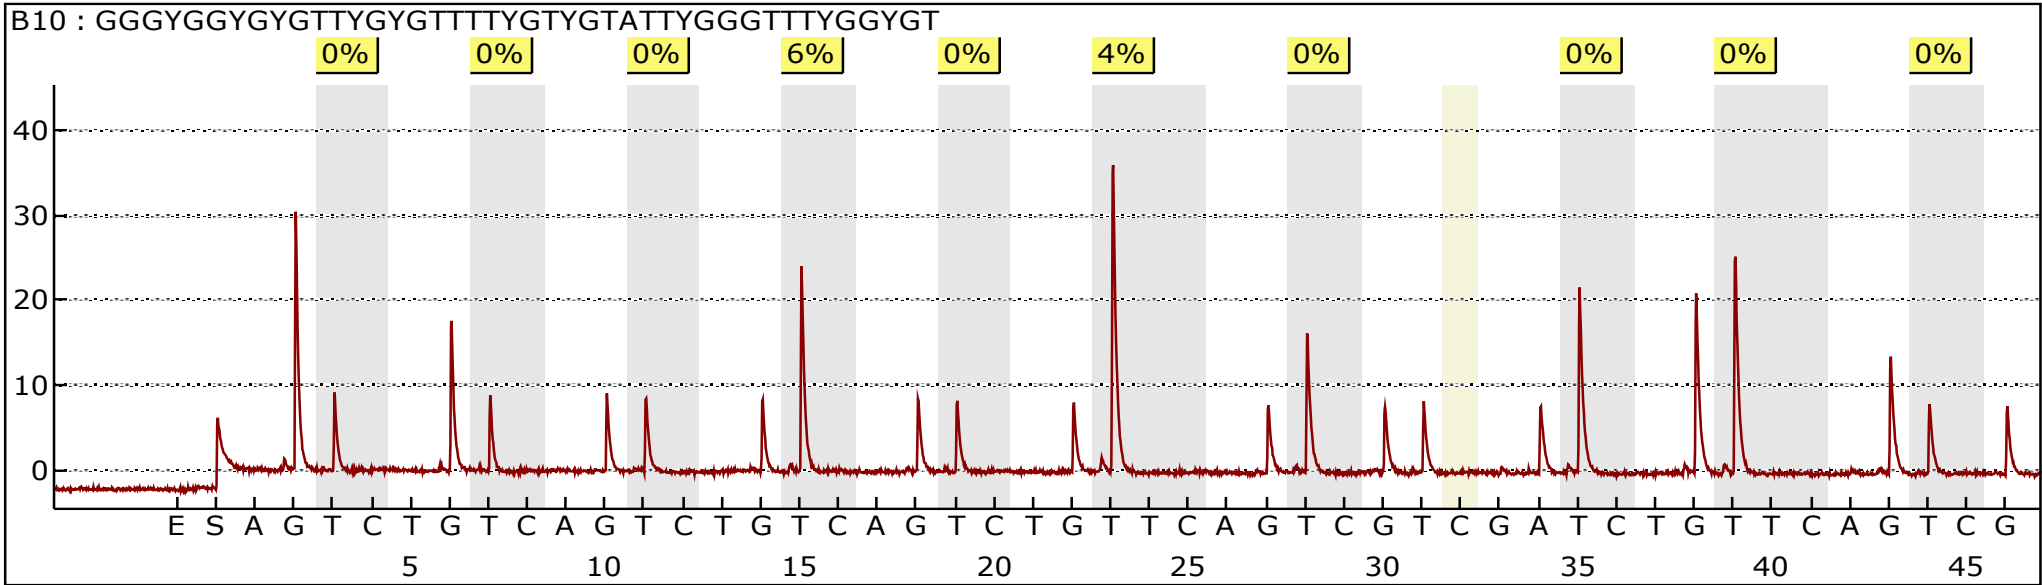

Assay Name: Mir17 CpG assay 1739-2047  
Sample ID: MDAMB468 cell line

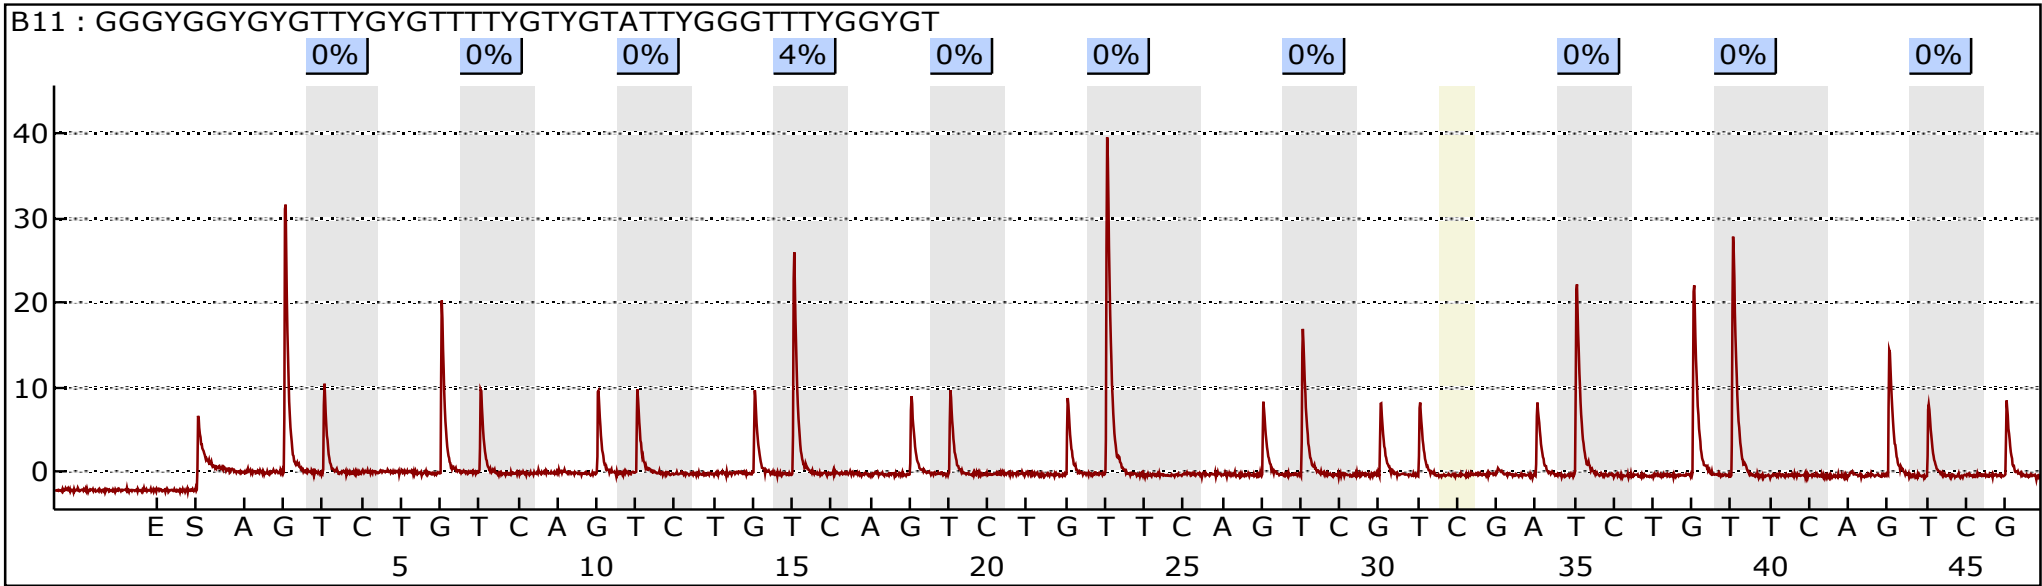

Assay Name: Mir17 CpG assay 1739-2047  
Sample ID: MCF7 cell line

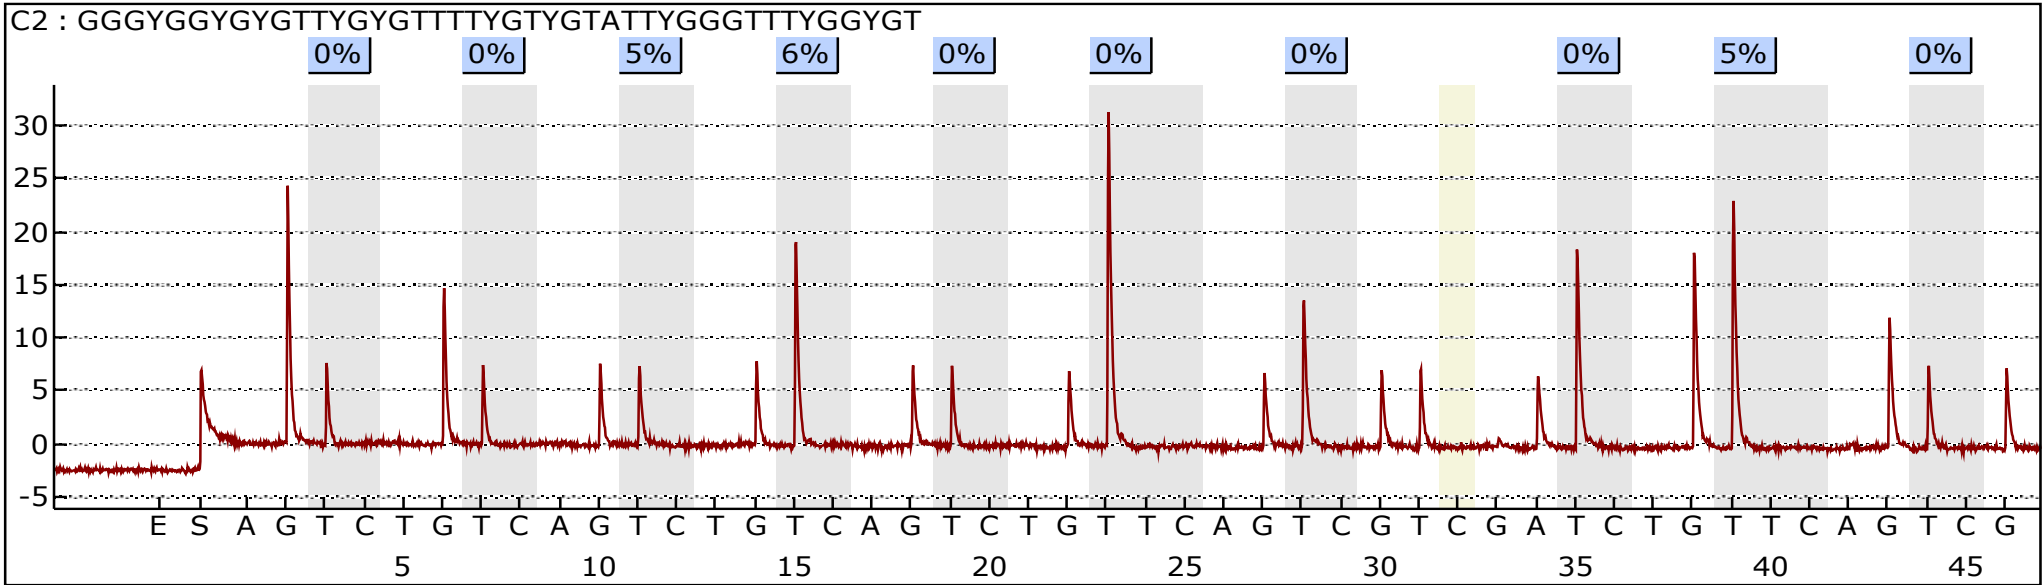

Assay Name: Mir17 CpG assay 1739-2047  
Sample ID: C0971 gDNA control

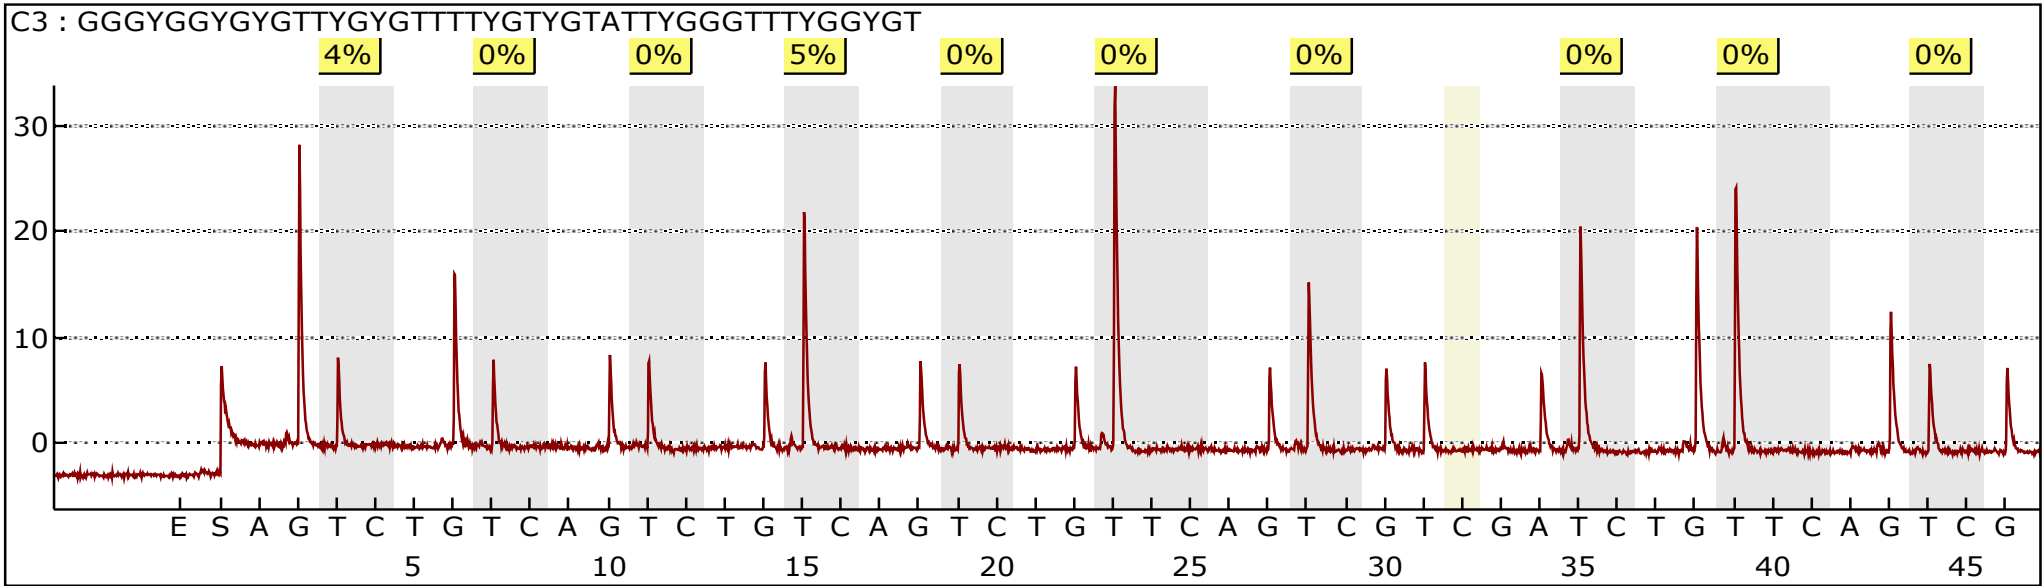

Assay Name: Mir17 CpG assay 1739-2047  
Sample ID: QA2 gDNA control

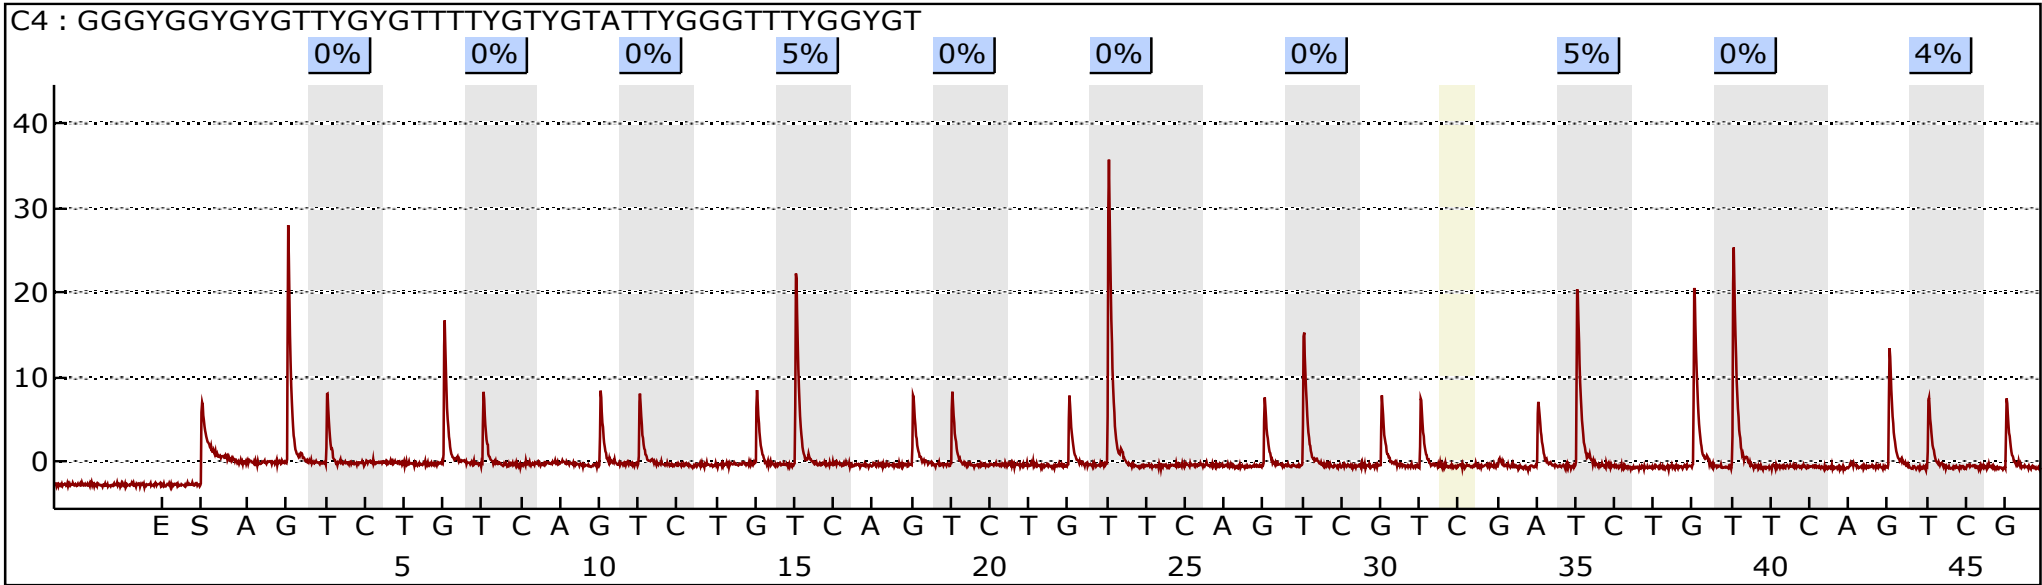

Assay Name: Mir17 CpG assay 1739-2047  
Sample ID: no template control

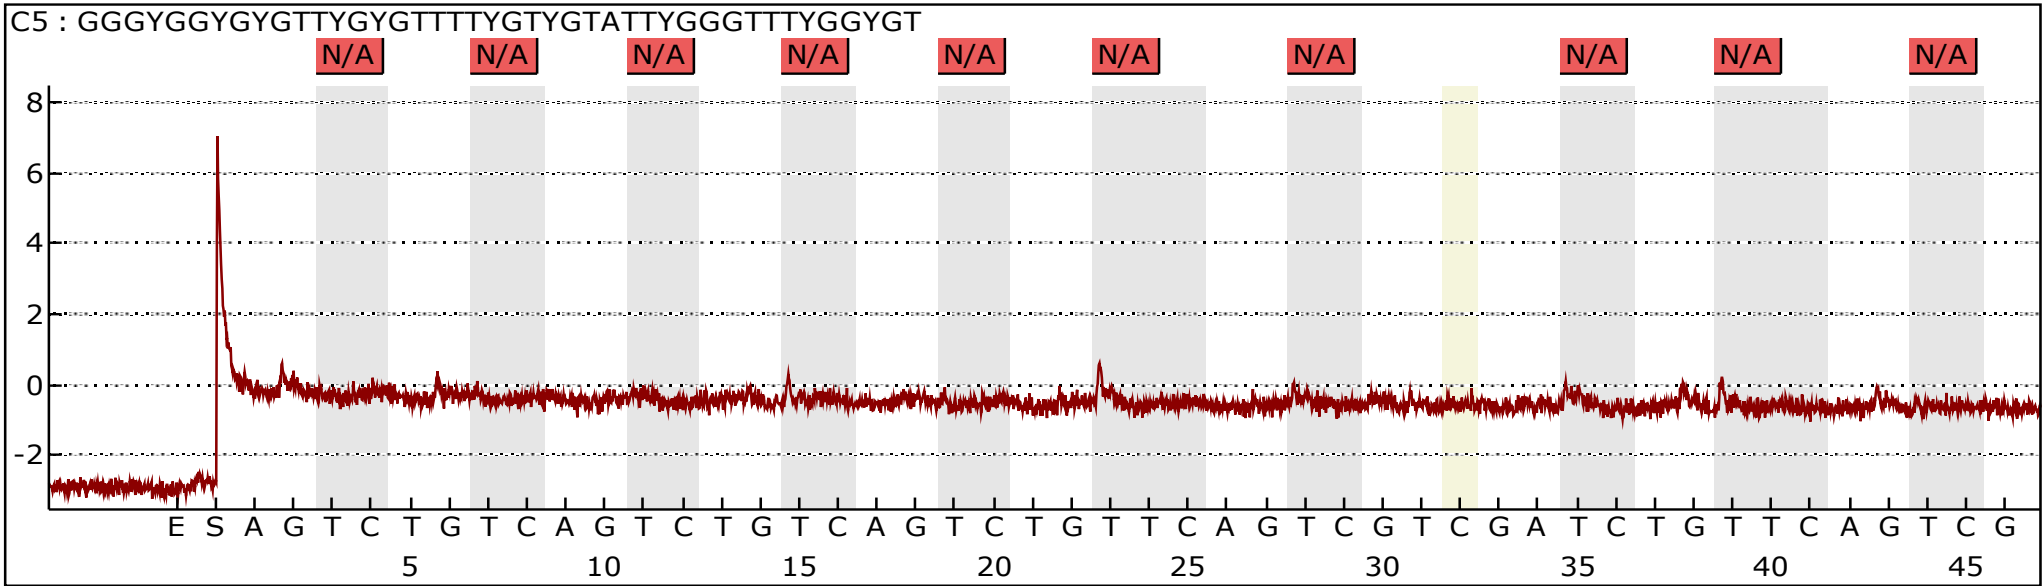

Supplement: Supplementary file [file 1]
