# Supplementary material
Source: publisher figshare collection journal article supplement (https://plos.figshare.com/articles/dataset/_/1565263)
Supplement: Supplementary file [file 1]

## S1 Fig

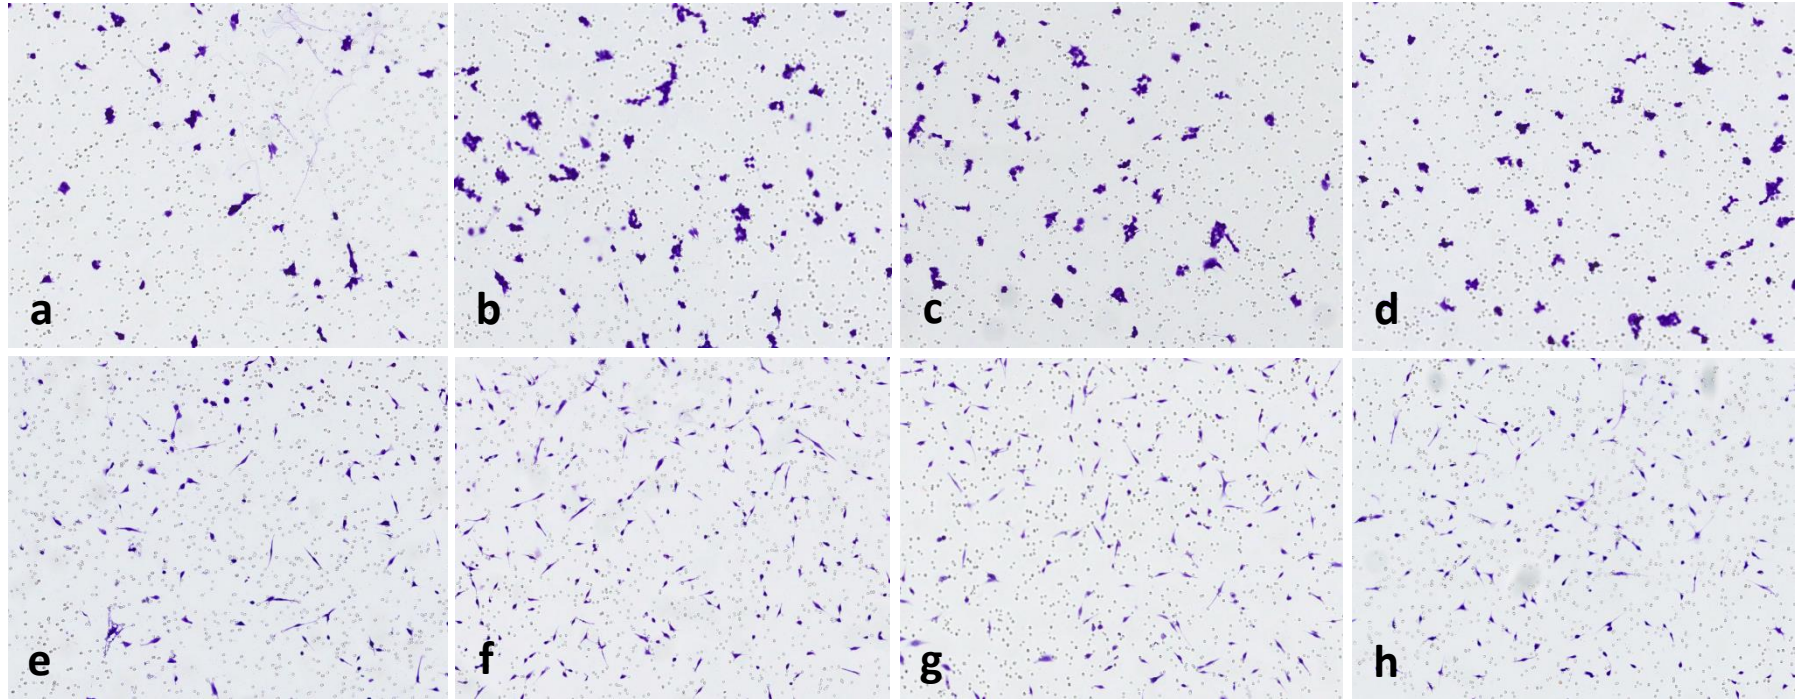

Invasive capacity of MCF-7 (a-d) and MDA-MB-231 (e-h) cells in response to NFs (a, b, e, f) or CAFs (c, d, g, h) using a Transwell assay. NFs in which miR92 was silenced (b, f) enhanced invasion in both cell lines compared to non-silenced controls (a, e), while no effect was seen in either cell line when miR92 was silenced in CAFs (d, h), compared to respective controls (c, g). Under control conditions, MDA-MB-231 (e, g) cells showed greater invasive capacity than MCF-7 (a, c), as predicted for this cell line. At the end of the assay, cell invasion through the Transwell™ was visualised using crystal violet staining.
