# Supplementary material
Source: publisher figshare collection journal article supplement (https://plos.figshare.com/articles/dataset/_/1565263)
Supplement: Supplementary file [file 1]

**Supplementary Table 1**

| <b>Target Gene</b> | <b>Function</b>                                                                                                                                   |
|--------------------|---------------------------------------------------------------------------------------------------------------------------------------------------|
| ITGA5              | Receptor for fibronectin and fibrinogen                                                                                                           |
| ARID4B             | Transcriptional repressor                                                                                                                         |
| HIPK3              | Ser/Thr protein kinase involved in transcription regulation                                                                                       |
| MYLIP              | E3 ubiquitin-protein ligase                                                                                                                       |
| TP63               | A member of the p53 family of transcription factors                                                                                               |
| KAT2B              | A histone acetyltransferase (HAT) to promote transcriptional activation                                                                           |
| ESR2               | Estrogen receptor family member/ nuclear receptor transcription factor superfamily member                                                         |
| TGFBR2             | Ser/Thr protein kinase/ TGF- $\beta$ receptor subfamily member                                                                                    |
| BMPR2              | Ser/Thr protein kinase/ bone morphogenetic protein (BMP) receptor family member                                                                   |
| CPEB2              | Similar to cytoplasmic polyadenylation element binding protein (CPEB), an mRNA-binding protein that regulates cytoplasmic polyadenylation of mRNA |

Top 10 validated targets of miR-92 identified from miRTarBase and TarBase v6 databases
